# Supplementary material for: High-aspect-ratio mushroom-like silica nanopillars immersed in air: epsilon-near-zero metamaterials mediated by a phonon-polaritonic anisotropy
Source: PubMed Central journal article supplement — RSC Adv. 2019 May 28;9(29):16431–8. doi: 10.1039/c9ra02494h (PMC9064425; doi:10.1039/c9ra02494h), 2019-05-28
Supplement: RA-009-C9RA02494H-s001.pdf [file RA-009-C9RA02494H-s001.pdf]

## High-aspect-ratio mushroom-like silica nanopillars immersed in air: epsilon-near-zero metamaterials mediated by a phonon-polaritonic anisotropy

Kota Ito, Yuri Yamada,\* Atsushi Miura, and Hideo Iizuka\*

\*CORRESPONDING AUTHORS : E-mail: [e4610@mosk.tytlabs.co.jp](mailto:e4610@mosk.tytlabs.co.jp), [hideo.iizuka@toyota.com](mailto:hideo.iizuka@toyota.com)

### 1. SEM images of SiO<sub>2</sub> dot arrays without O<sub>2</sub> plasma process.

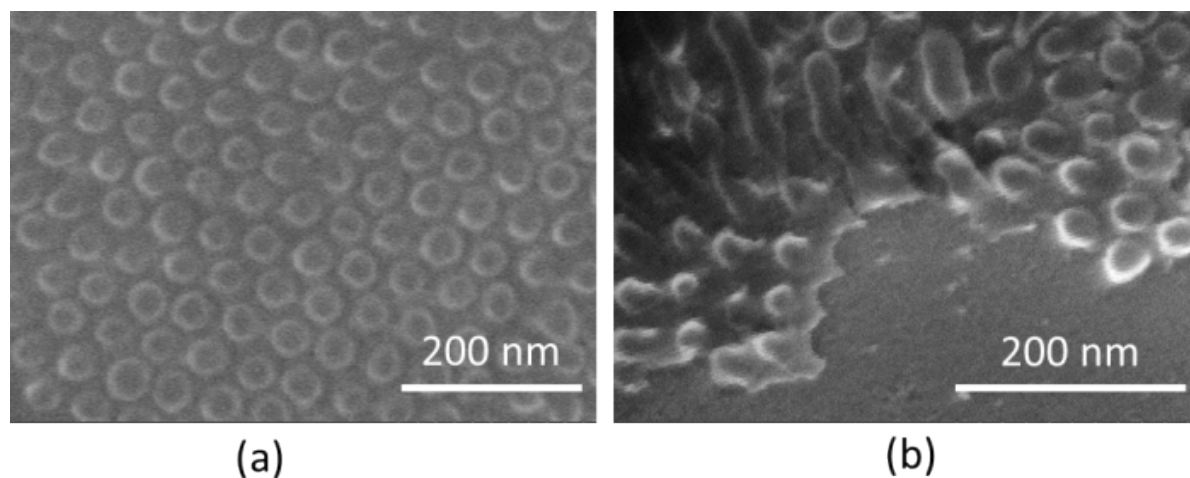

**Figure S1** SEM images of SiO<sub>2</sub> dot arrays fabricated from the 5 wt % PS-*b*-PDMS solution without O<sub>2</sub> plasma process. After the continuous CF<sub>4</sub> and O<sub>2</sub> RIE, a film was calcined at 450 °C successively. Although, the hexagonal regularity is maintained in (a), only dot arrays are unveiled in (b).

## 2. X-ray photoelectron spectroscopy (XPS) depth profiling analysis on SiO<sub>2</sub> nanopillars.

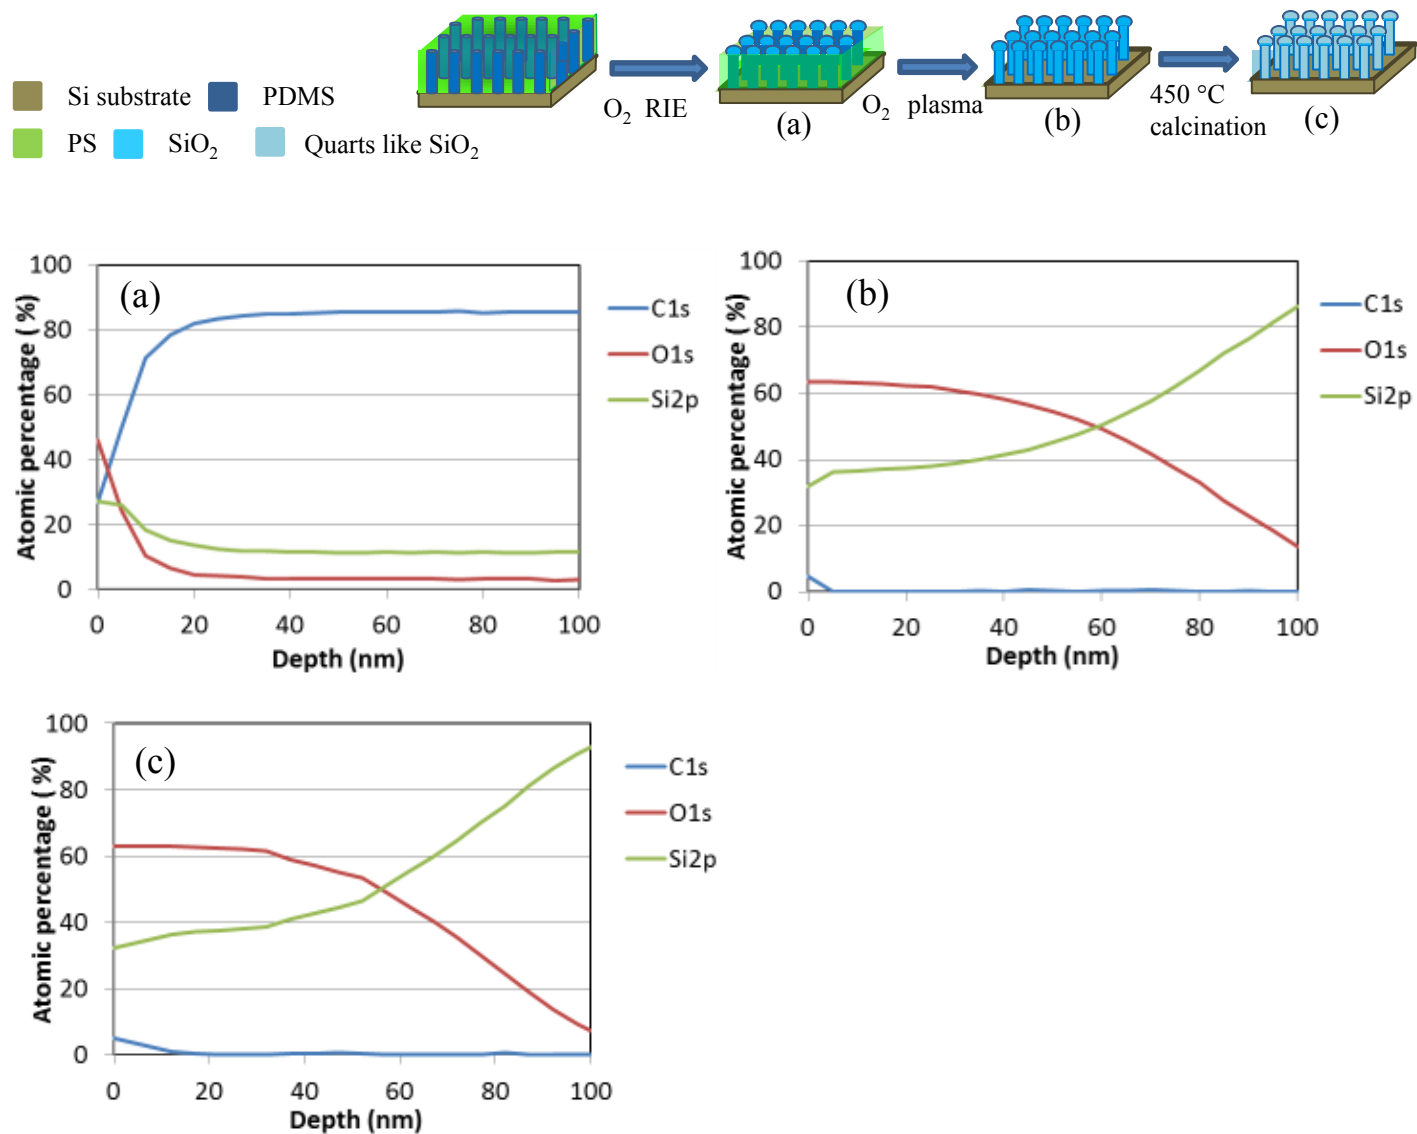

**Figure S2** XPS depth profile analysis was carried out to assess the chemical states of nanopillars after (a) O<sub>2</sub> RIE (before O<sub>2</sub> plasma), (b) O<sub>2</sub> plasma for 240 s, and (c) O<sub>2</sub> plasma for 240 s, followed by calcination at 450 °C. Measurements were conducted with a Quantera SXM (ULVAC-PHI, Inc.) with monochromated Al K $\alpha$  radiation at a take-off angle of 45°. Relatively thick oxide layers are confirmed in (b) and (c) from O1s core level spectra.

### 3. Depolarization factors

The depolarization factor measures the degree of the film uniformity and the backside reflection. The depolarization factor is expressed as:

$$p = 1 - \sqrt{(S_1^2 + S_2^2 + S_3^2)/S_0}$$

where  $S_1$ ,  $S_2$  and  $S_3$  are the Stokes parameters. When the depolarization factor is 0, the light is totally polarized. When the depolarization factor is 1, the light is unpolarized. On the measurement, we have verified that the depolarization factor is close to 0.

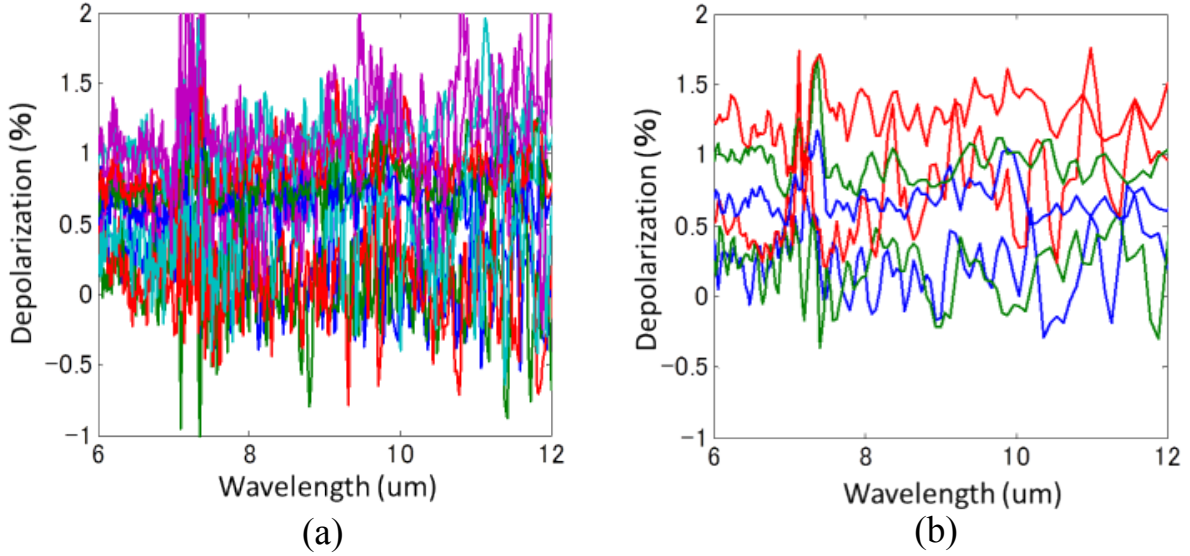

**Figure S3** Depolarization factors measured in the optical ellipsometry on (a) nanopillars fabricated from the 5 wt% PS-*b*-PDMS solution and (b) the Si substrate. Data are obtained at angles of 55° (blue line), 60° (green line), 65° (red line), 70° (cyan line), and 75° (purple line), respectively.

### 4. Calculated Lorentz parameters

**Table S1** Lorentz parameters to fit the ellipsometrically measured parameters  $\Psi$  and  $\Delta$ .

| $\epsilon_\infty$ | $A_1$  | $\omega_{01}$<br>(rad/sec) | $\Gamma_1$<br>(rad/sec) | $A_2$  | $\omega_{02}$<br>(rad/sec) | $\Gamma_2$<br>(rad/sec) | $f$   |
|-------------------|--------|----------------------------|-------------------------|--------|----------------------------|-------------------------|-------|
| 1.884             | 0.0969 | $2.207 \times 10^{14}$     | $2.810 \times 10^{13}$  | 0.4044 | $2.015 \times 10^{14}$     | $9.669 \times 10^{12}$  | 0.292 |
